# Supplementary material for: Comparative Study of Two-Dimensional (2D) vs. Three-Dimensional (3D) Organotypic Kertatinocyte-Fibroblast Skin Models for Staphylococcus aureus (MRSA) Infection
Source: MDPI journal article supplement (doi:10.3390/ijms23010299), 2021-12-28
Supplement: s1 [file s1]

**Table S1:** The clonal complex, *spa* type, MLST types, SCC*mec* types and virulence genes in six MRSA strains used in this study.

| Strain ID   | CC <sup>a</sup> | <i>spa</i> type | MLST<br>(SCC <i>mec</i> type) | Virulence genes                                                                                                                                                                               |
|-------------|-----------------|-----------------|-------------------------------|-----------------------------------------------------------------------------------------------------------------------------------------------------------------------------------------------|
| CUHK_M20_01 | CC30            | t019            | ST30 IV <sup>c</sup>          | <i>cap8A, cap8C, cap8G, cap8K, cap8O, chp, esaA, essA, essB, esxA, hld, hlgA, icaA, icaB, icaR, isdE, isdF, isdG, lukF-PV, lukS-PV, sak, scn, sspC,</i>                                       |
| CUHK_M20_02 | NT <sup>b</sup> | t437            | ST59 IV <sup>a</sup>          | <i>aur, cap8C, cap8E, cap8G, cap8I, cap8P, chp, esaB, essA, essB, esxA, hld, hlgA, hlgB, hly/hla, icaA, icaB, icaC, icaD, icaR, isdE, srtB, lukF-PV, lukS-PV, sak, scn</i>                    |
| CUHK_M20_03 | CC22            | t3212           | ST22 IV                       | <i>cap8C, cap8D, cap8E, cap8G, cap8L, cap8M, cap8P, essA, esxA, Hld, hlgA, icaA, icaB, icaD, icaR, isdC, isdE, isdG, sak, scn, srtB, sspB sspC</i>                                            |
| CUHK_M20_04 | CC45            | t1081           | ST45 V <sup>c</sup>           | <i>cap8C, cap8G, cap8P, chp, esaB, essA, essB, esxA, esxB, hld, hlgA, icaA, icaB, icaD, isdE, sak, scn</i>                                                                                    |
| CUHK_M20_05 | CC8             | t037            | ST239 III <sup>d</sup>        | <i>cap8A, cap8C, cap8G cap8O, cap8K esaA, essA, essB, esxA, hld, hlgA, hlgB, hlgC, hly/hla, icaA, icaB, icaR, isdA, isdB, isdC, isdD, isdE, isdF, isdG map, sak, scn sea srtB, sspC, vWbp</i> |

|             |     |      |           |                                                                                                                                                                                                                                                                                                |
|-------------|-----|------|-----------|------------------------------------------------------------------------------------------------------------------------------------------------------------------------------------------------------------------------------------------------------------------------------------------------|
| CUHK_M20_15 | CC8 | t008 | ST8 (IVa) | <i>aur, cap8A, cap8C, cap8D, cap8E, cap8F, cap8G, cap8L, cap8M, cap8P, chp, esaA, esaB, essA, essB, esxA, esxB, geh, hld, hlgA hlgB, hlgC, hly/hla, , icaA, icaB, icaC, icaD, icaR, isdA, isdB, isdC, isdD, isdE, isdF, isdG, lip, lukF-PV, lukS-PV, map, sak, scn, srtB, sspB, sspC, vWbp</i> |
|-------------|-----|------|-----------|------------------------------------------------------------------------------------------------------------------------------------------------------------------------------------------------------------------------------------------------------------------------------------------------|

---

<sup>a</sup>CC: Clonal Complex

<sup>b</sup> NT: Not typeable.

V<sup>c</sup>: This SCCmec\_type\_V does not carry a *ccrC1*, class-C2-*mec*, *ccrC1* .

III<sup>d</sup>: This SCCmec\_type\_III carries an additional class 5 *ccr*
